# Supplementary material for: Genotypic and phenotypic features of all Spanish patients with McArdle disease: a 2016 update
Source: PubMed Central journal article supplement (PMC5688471; doi:10.1186/s12864-017-4188-2), 2017-11-14
Supplement: 12864_2017_4188_MOESM1_ESM.pdf [file 12864_2017_4188_MOESM1_ESM.pdf]

**Additional file 1.** Distribution of pathogenic mutations causing McArdle disease in Spanish patients by exon/intron.

| Localization     | Mutations                                                                                                                                                                                               |
|------------------|---------------------------------------------------------------------------------------------------------------------------------------------------------------------------------------------------------|
| <b>Exon 1</b>    | p.R50X (c.148C>T), p.L5VfsX22 (c.13_14delCT), p.E27AfsX50 (c.78_79delTG), <b>p.H35R (c.104A&gt;G)</b> , p.A55GfsX21 (c.164_168delCTCTG), <b>p.R70C (c.208C&gt;T)</b> , p.Q73HfsX7 (c.212_218dupCGCAGCA) |
| <b>Exon 2</b>    | p.I83F (c.247A>T), <b>p.R94Q (c.281G&gt;A)</b> , p.R94W (c.280C>T)                                                                                                                                      |
| <b>Exon 3</b>    | p.L116P (c.347T>C), p.E125X (c.373G>T), <b>p.L132WfsX163 (c.393delG)</b> , <b>p.N134KfsX161 (c.402delC)</b> , p.G135R (c.403G>A), p.G136AfsX159 (c.407delG)                                             |
| <b>Exon 4</b>    | <b>p.G174D (c.521G&gt;A)</b> , <b>p.Q176P (c.527A&gt;C)</b> , <b>p.Q176P (c.527A&gt;C)</b>                                                                                                              |
| <b>Exon 5</b>    | p.G205S (c.613G>A), p.R194W (c.580C>T), p.K215K (c.645G>A)                                                                                                                                              |
| <b>Exon 6</b>    |                                                                                                                                                                                                         |
| <b>Exon 7</b>    |                                                                                                                                                                                                         |
| <b>Exon 8</b>    |                                                                                                                                                                                                         |
| <b>Exon 9</b>    | <b>p.L354P (c.1061T&gt;C)</b> , <b>p.E349K (c.1045G&gt;A)</b>                                                                                                                                           |
| <b>Exon 10</b>   | p.A365V (c.1094C>T), p.E383K (c.1147G>A), p.W388SfsX34 (c.1162_1169delTGGCCGGTinsA)                                                                                                                     |
| <b>Exon 11</b>   | p.M442K (c.1325T>A), <b>p.G455R (c.1363G&gt;C)</b> , p.V456M (c.1366G>A)                                                                                                                                |
| <b>Exon 12</b>   | <b>p.T488N (c.1463C&gt;A)</b> , <b>p.R490W (c.1468C&gt;T)</b> , p.R491AfsX7 (c.1470dupG)                                                                                                                |
| <b>Exon 13</b>   | p.R534VfsX5 (c.533delA)                                                                                                                                                                                 |
| <b>Exon 14</b>   | <b>p.Y574X (c.1722T&gt;G)</b> , <b>p.Q577R (c.1730A&gt;G)</b> , <b>p.R576Q (c.1727G&gt;A)</b> , p.R576X (c.1726C>T), p.L587P (c.1760T>C)                                                                |
| <b>Exon 15</b>   | p.R590H (c.1769G>A), p.R602W (c.1804C>T), p.K609K (c.1827G>A)                                                                                                                                           |
| <b>Exon 16</b>   | <b>c.(1969+214)_ (2177+369)del</b>                                                                                                                                                                      |
| <b>Exon 17</b>   | p.A660D (c.1979C>A), p.N685Y (c.2053A>T), p.T692KfsX30 (c.2075_2076delCCinsAAA), p.G695R (c.2083G>A), p.A704V (c.2111C>T), p.R715W (c.2143C>T)                                                          |
| <b>Exon 18</b>   | p.Y733X (c.2199C>G), p.K754NfsX49 (c.2262delA), <b>p.Q755X (c.2263C&gt;T)</b> , p.R771PfsX33 (c.2310_2311dupCC)                                                                                         |
| <b>Exon 19</b>   | p.C784X (c.2352C>A)                                                                                                                                                                                     |
| <b>Exon 20</b>   | p.W798R (c.2392T>C), <b>p.E797VfsX18 (c.2385_2386delAA)</b>                                                                                                                                             |
|                  |                                                                                                                                                                                                         |
| <b>Intron 2</b>  | <b>c.244-3_244-2CA</b>                                                                                                                                                                                  |
| <b>Intron 4</b>  | <b>c.528-8G&gt;A (p.Q176_M177insVQ)</b>                                                                                                                                                                 |
| <b>Intron 6</b>  | <b>c.772-2A&gt;T</b>                                                                                                                                                                                    |
| <b>Intron 7</b>  | <b>c.855+5G&gt;A</b>                                                                                                                                                                                    |
| <b>Intron 9</b>  | c.1092-1G>T                                                                                                                                                                                             |
| <b>Intron 14</b> | c.1768+1G>A                                                                                                                                                                                             |
| <b>Intron 19</b> | <b>c.2379-1G&gt;A</b>                                                                                                                                                                                   |

New, previously unreported mutations are in bold and mutations only found in one patient are in grey color.
