# Supplementary material for: Genotypic and phenotypic features of all Spanish patients with McArdle disease: a 2016 update
Source: PubMed Central journal article supplement (PMC5688471; doi:10.1186/s12864-017-4188-2), 2017-11-14
Supplement: 12864_2017_4188_MOESM2_ESM.pdf [file 12864_2017_4188_MOESM2_ESM.pdf]

|                       |   |                        |         |                        | <b>TOTAL</b> |                       |          |                      |         |             |
|-----------------------|---|------------------------|---------|------------------------|--------------|-----------------------|----------|----------------------|---------|-------------|
| <b>Ex 1</b><br>19.65% | + | <b>Ex 17</b><br>10.98% | +       | <b>Ex 18</b><br>15.60% | = 46.23%     | <b>46.23%</b>         |          |                      |         |             |
| <b>Ex 2</b><br>8.09%  | + | <b>Ex 15</b><br>7.51%  | = 15.6% |                        |              | <b>61.83%</b>         |          |                      |         |             |
| <b>Ex 3</b><br>5.78%  | + | <b>Ex 10</b><br>5.78%  | +       | <b>Ex 12</b><br>4.05%  | +            | <b>Ex 14</b><br>5.78% | = 21.39% | <b>83.22%</b>        |         |             |
| <b>Ex 5</b><br>5.21%  | + | <b>Ex 11</b><br>2.89%  | +       | <b>Ex 19</b><br>2.31%  | = 10.41%     | <b>93.63%</b>         |          |                      |         |             |
| <b>Ex 4</b><br>1.16%  | + | <b>Ex 9</b><br>1.16%   | +       | <b>Ex13</b><br>1.16%   | +            | <b>Ex16</b><br>0.58%  | +        | <b>Ex20</b><br>2.31% | = 6.37% | <b>100%</b> |

**Supplemental file 2.** Frequency distribution of pathogenic *PYGM* mutations by exon. Abbreviation: Ex, exon
